# Quantifying long-term predictability in microbial plankton dynamics

5

Caterina R. Giner\*<sup>1</sup>, Vanessa Balagué<sup>1</sup>, Anders K. Krabberød<sup>2</sup>, Isabel Ferrera<sup>1</sup>, Albert Reñé<sup>1</sup>,  
Esther Garcés<sup>1</sup>, Josep M. Gasol<sup>1</sup>, Ramiro Logares\*<sup>1</sup> and Ramon Massana\*<sup>1</sup>

10

<sup>1</sup> Institut de Ciències del Mar (CSIC), Passeig Marítim de la Barceloneta, 37-49, ES-08003, Barcelona, Catalonia, Spain

15

<sup>2</sup> University of Oslo, Department of Biosciences, Section for Genetics and Evolutionary Biology (Evogene), Blindernv. 31, N-0316 Oslo, Norway

**\* Corresponding authors:**

20

caterina@icm.csic.es, ramiro.logares@icm.csic.es, ramonm@icm.csic.es

Institute of Marine Sciences (ICM-CSIC)

Passeig Marítim de la Barceloneta 37-49

08003, Barcelona, Catalonia, Spain

Phone: 34-93-2309500

25

Fax: 34-93-2309555

30

## ABSTRACT

Determining predictability in community turnover is a key ecological question. In the microbial world, seasonality has been reported for communities inhabiting temperate zones, but not much is known on seasonality for individual species. Specifically, we have a vague  
35 understanding on the amount of species displaying predictability during temporal community turnover as well as on their dynamics. Here we developed a '*Recurrence Index*' to quantify predictability in microbial species. Applying our index to 18S rDNA metabarcoding data from one of the longest temporal observatories of marine plankton we determined that 13% of the picoeukaryotic and 19% of the nanoeukaryotic species, accounting for about 40% of the  
40 community abundance in both fractions, feature predictable dynamics when sampled monthly during 10 years. Thus, most of the species analysed had unpredictable temporal abundance patterns. Altogether, we show that species with both predictable and unpredictable temporal dynamics can occur within the same seasonal microbial community.

45

## INTRODUCTION

A major challenge in ecology is to understand the mechanisms that determine community turnover across space and time. Community turnover can be explained by four main processes: selection, (ecological) drift, dispersal and speciation (Vellend 2010).

50 Determining to what extent the combination of the latter four processes structure different communities is a current challenge for ecologists. This framework that derives mostly from the study of multicellular organisms has recently been applied to the microbial world (Hanson *et al.* 2012; Stegen *et al.* 2013). Microbes are key players in most ecosystems, yet we have a limited understanding of what governs their community turnover. For prokaryotes,  
55 environmental selection seems to be the most important process structuring communities (Lindström & Langenheder 2012) although there is also evidence indicating that stochastic processes (e.g. drift and dispersal) have a role (Ofiteru *et al.* 2010). Furthermore, multiple members of a community can be structured by distinct processes at different times, with some taxa responding, e.g., to selection, while others presenting stochastic assembly patterns  
60 (Langenheder & Szekely 2011; Stegen *et al.* 2013).

While many studies have concentrated on investigating spatial patterns of microbial community turnover (Lindström & Langenheder 2012), fewer have focused on exploring temporal dynamics (Fuhrman *et al.* 2015; Bunse & Pinhassi 2017). Given the relevance of microbial marine plankton for the functioning of the biosphere (Falkowski 2012),  
65 understanding the predictability in their dynamics should help comprehending their response to disturbance or global change. Ascertaining predictability in community turnover can also provide hints on the amount of functional redundancy present in the ecosystem (Allison & Martiny 2008), as communities dominated by functionally interchangeable taxa may exhibit a low degree of predictability in species composition with time. In the latter case, ecological

70 drift could have a more relevant role than selection in determining community turnover  
(Chase 2003).

Annual cycles driven by meteorological seasons in temperate zones have clear effects  
on terrestrial ecosystems. In phytoplankton assemblages, yearly cycles in light, temperature  
and nutrients are known to induce clear abundance dynamics (estimated using chlorophyll-*a*  
75 concentration), generally with one or two abundance peaks per year, although cases with  
unclear patterns have also been observed (Winder & Cloern 2010). To date, different studies  
indicate that microbial community turnover is correlated with meteorological seasons  
(Fuhrman *et al.* 2015; Bunse & Pinhassi 2017), but most studies of microbial community  
dynamics have focused on prokaryotes, although eukaryotes also constitute key elements of  
80 microbial communities (Caron *et al.* 2009). One could expect that due to the structural and  
behavioural differences between eukaryotes and prokaryotes (Massana & Logares 2013;  
Keeling & Del Campo 2017) they may show different temporal dynamics. So far, temporal  
studies published (time series typically <5 years) hint at seasonality in microbial eukaryotic  
communities at the bulk level (Romari & Vaultot 2004; Countway *et al.* 2010; Kim *et al.*  
85 2014; Genitsaris *et al.* 2015; Piredda *et al.* 2017).

Most studies on microbial dynamics have investigated whole community patterns,  
which are driven by abundant taxa. Investigating the temporal behaviour of individual taxa is  
important as some members of a microbial community could respond differently to cyclic  
environmental variation, while others may present no response. Focusing on individual taxa  
90 may also help detecting differences in abundance dynamics over time and in their persistence,  
with some species exhibiting i.e. smooth temporal fluctuations and others displaying rapid  
fluctuations. Furthermore, as most microbial communities are composed by a few abundant  
and a large number of low-abundant or rare taxa (Pedrós-Alió 2006, 2012; Logares *et al.*

2014; Logares *et al.* 2015), it is relevant to explore the temporal behaviour (i.e. the  
95 recurrence) across the taxa-abundance spectrum. Rare taxa can be metabolically active  
(Logares *et al.* 2015), respond to environmental change (Campbell *et al.* 2011; Lindh *et al.*  
2015) and present repeatable community assembly patterns (Alonso-Saez *et al.* 2015). In  
temporal surveys, rare taxa can be assigned to one of three categories: (a) “Seasonal” taxa that  
were rare at the time of sampling, but which are systematically recruited to the abundant  
100 community during specific time periods, (b) “Opportunistic taxa” that are generally rare but  
become abundant exceptionally and for a short time [a.k.a. conditionally rare taxa, (Shade *et al.*  
*et al.* 2014)], or (c) “permanently rare” taxa that never (within the limitations of the sampling  
design) become abundant (Logares *et al.* 2015).

Here we analyse and quantify the recurrence in the long-term community dynamics of  
105 microbial eukaryotes inhabiting an oligotrophic coastal site in the Mediterranean Sea [Blanes  
Bay Microbial Observatory, BBMO, (Gasol *et al.* 2016)]. Microbial eukaryotes were sampled  
monthly during 10 years in two size fractions and their diversity was assessed by high-  
throughput sequencing the 18S rDNA (V4 region). We developed a metric to detect and  
quantify temporal recurrence in different taxa (hereafter *Recurrence Index*), which allowed us  
110 to determine that 13.2% and 18.6 % of the pico- and nanoeukaryotic Operational Taxonomic  
Units (OTUs), representing up to 40% of the relative abundance, featured predictable  
dynamics. We also observed that the overall system presents annual seasonality with two  
main recurrent configurations, and that these communities did not increase their  
differentiation along the 10 sampled years.

115

## MATERIALS AND METHODS

### *Study site and sampling*

We carried out a monthly sampling during 10 years at the Blanes Bay Microbial Observatory (BBMO) located in the North Western Mediterranean Sea (41°40'N, 2°48'E).

120 This is a well-studied temperate oligotrophic coastal site that has relatively little human or riverine influence (Gasol *et al.* 2016). Surface water was sampled about 1 km offshore over a water column of 20 m depth, from January 2004 to December 2013. Water temperature and salinity were measured *in situ* with a CTD. Seawater was pre-filtered through a 200 µm nylon-mesh, transported to the laboratory under dim light in 20 L plastic carboys, and  
125 processed within 2 h. Samples for determination of chlorophyll-*a* concentration were filtered in GF/F filters, extracted with acetone and processed by fluorometry (Yentsch & Menzel 1963). Inorganic nutrients ( $\text{NO}_3^-$ ,  $\text{NO}_2^-$ ,  $\text{NH}_4^+$ ,  $\text{PO}_4^{3-}$ ,  $\text{SiO}_2$ ) were measured spectrophotometrically using an Alliance Evolution II autoanalyzer (Grasshoff *et al.* 1983). In statistical analyses, these variables were standardized as z-scores, that is, deviations of the  
130 values from the global mean.

About 6 L of the 200 µm prefiltered seawater were sequentially filtered using a peristaltic pump through a 20 µm nylon mesh, a 3 µm pore-size polycarbonate filter of 47 mm diameter (nanoplankton fraction, 3-20 µm), and a 0.2 µm pore-size Sterivex unit (Millipore, Durapore) [picoplankton fraction, 0.2–3 µm]. Sterivex units and the 3 µm filters were stored  
135 at -80°C. DNA extractions were performed at the end of the sampling period using a standard phenol-chloroform protocol (Schauer *et al.* 2003; Massana *et al.* 2004), with a final step of purification in Amicon units (Millipore). Nucleic acid extracts were quantified in a NanoDrop-1000 spectrophotometer (Thermo Scientific) and stored at -80°C until analysis.

140 *DNA sequencing and bioinformatics*

The eukaryotic universal primers TAREukFWD1 and TAREukREV3 (Stoeck *et al.* 2010) were used to amplify the V4 region of the 18S rDNA (~380 bp). PCR amplification and amplicon sequencing was carried out at the Research and Testing Laboratory (<http://rtlgenomics.com/>) using the *Illumina* MiSeq platform (2x250 bp paired-end sequencing).

145 *Illumina* reads were processed following an in-house pipeline (Logares 2017). Operational Taxonomic Units (OTUs) were delineated by clustering sequences at 99% similarity using UPARSE (Edgar 2013) as implemented in USearch v8.1. Only OTUs present in at least 3 samples were retained. Taxonomy was assigned roughly at class-level by BLASTing OTU representative sequences against PR<sup>2</sup> (Guillou *et al.* 2013) and two in-house marine protist  
150 databases (available at <https://github.com/ramalok>) based in a collection of Sanger sequences (Pernice *et al.* 2013) or 454 reads (Massana *et al.* 2015). Metazoan, Streptophyta and nucleomorphs were removed. Two OTU tables were generated: (1) the pico-nano-eukaryotic OTU-table had 120 samples of picoeukaryotes and 89 of nanoeukaryotes (samples from May-2010 to July-2012 and from 4 additional dates were discarded due to suboptimal sequencing);  
155 (2) the picoeukaryotic OTU-table had 120 samples. To enable sample comparisons, both tables were randomly subsampled to the lowest number of reads per sample using the *rrarefy* function in *Vegan* (Oksanen *et al.* 2008). The pico-nano-eukaryotic table was subsampled to 5,898 reads per sample (14,771 OTUs), while the picoeukaryotic table was subsampled to 7,553 reads per sample (13,040 OTUs). The sequence data are publicly available at the  
160 European Nucleotide Archive with accession numbers XXXX.

### *Recurrence analyses and community dynamics*

165 We developed a *Recurrence Index* (RI) to identify taxa presenting temporal recurrence  
or predictable dynamics. To calculate the RI, we first applied the ACF (Auto-Correlation  
Function) comparing taxa (OTUs or taxonomic Classes) relative abundances at different time  
lags. Then, we summed the absolute ACF values for each taxon along the complete temporal  
series (RF). Afterwards, we compared the RF values against a null distribution obtained after  
170 randomizing 1,000 times the taxa abundances and calculating the absolute sums of the  
randomized ACF values. Subsequently, we calculated the mean of the null model ( $RF_{\text{random}}$ )  
for each taxon plus its 97% confidence intervals (CI). The RI was calculated as:  
 $RI = RF / RF_{\text{random}}$ . Based on empirical tests, a given taxon was considered recurrent if a) its RI  
was above a given threshold, here 1.20 for picoeukaryotes, and 1.15 for nanoeukaryotes, and  
175 if b) its RF was significantly higher than  $RF_{\text{random}}$  (that is, outside the CI and within the upper  
1.5% probability). The code used to calculate RI is publicly available (Giner *et al.* 2017) and  
ready-to-use in R through EcolUtils (Salazar 2015). Detected recurrent picoeukaryotic taxa  
were classified to reflect how long was their presistance in the temporal-series according to  
their changes in abundance. For this, we identified for each taxon the number of months with  
180 abundances above the 10-year mean. Taxa displaying >30 months above this mean (i.e. at  
least 3 times per year, on average) were considered ‘long’-persistent, while those displaying  
less than 30 months were considered ‘short’-persistent.

To investigate recurrence in whole community dynamics, we computed the mean  $\beta$ -  
diversity (Bray-Curtis dissimilarities) for all pairs of samples taken  $n$  months apart ( $n$  ranging  
185 from 1 to 119 months for picoeukaryotes). In order to determine whether the observed  $\beta$ -  
diversity could be generated by random community dynamics, we calculated the Raup-Crick  
metric (Chase *et al.* 2011) using Bray-Curtis dissimilarities [hereafter  $RC_{\text{bray}}$ ] for the



picoeukaryotes, following Stegen *et al.* (2013).  $RC_{\text{bray}}$  compares the measured  $\beta$ -diversity against the  $\beta$ -diversity that would be obtained under random community assembly. For each pair of communities, the randomization was run 999 times. Only OTUs with >500 reads were included in this analysis.  $RC_{\text{bray}}$  values  $> +0.95$  or  $< -0.95$  are interpreted as significant departures from a stochastic community assembly, pointing to deterministic assembly forces, such as environmental selection. On the contrary,  $RC_{\text{bray}}$  values between  $-0.95$  and  $+0.95$  point to stochastic community assembly (Chase *et al.* 2011).

195

#### *Community turnover and response of single OTUs to environmental variables*

Non-metric multidimensional scaling (NMDS) was based on Bray-Curtis dissimilarity matrices. In NMDS, differences between predefined groups were tested with ANOSIM [ANalysis Of SIMilarity, (Clarke 1993)] performing 1,000 permutations. To determine the proportion of variation in community composition explained by environmental variables we used PERMANOVA. We also analysed the correlation between the matrix of environmental variables and that of community differentiation using Partial Mantel tests (Legendre & Legendre 1998) as well as by fitting environmental variables onto the ordination space of the NMDS (*envfit* function in *Vegan*). Finally, we performed an *IndVal* analysis [INDicator VALues, (Dufrene & Legendre 1997)] to identify OTUs associated to a specific season. OTUs with statistically significant ( $p < 0.05$ ) *IndVal* values  $> 0.3$  were considered season-specific, following Logares *et al.* (2013). All analyses were performed using functions implemented in the packages *Vegan* (Oksanen *et al.* 2008), *pvclust* (Suzuki & Shimodaira 2006), and *Labdsv* (Roberts 2016) within the R Statistical environment (R-Development-Core-Team 2008).

Correlations between individual OTUs and environmental variables were done using extended local similarity analysis [eLSA] (Ruan *et al.* 2006; Xia *et al.* 2011). The analysis was based on the subsampled picoeukaryotic OTU-table together with the environmental  
215 variables. OTUs that were not present in at least 10 out of 120 months were excluded from the analysis, resulting in a dataset with 1,065 OTUs and 9 environmental variables. ELSA was run with default normalization (a z-score transformation using the median and median absolute deviation) and p-value estimations under a mixed model that performs a random permutation test of a co-occurrence only if the theoretical p-values for the comparison are  
220 <0.05. Missing data were interpolated linearly from adjacent months, and we did not allow any time delay.

Only the picoeukaryotic OTU table was used in rarity analyses. OTUs with abundances per sample that were always < 0.1% were considered permanently rare (Logares *et al.* 2015). To exclude the possibility that rare OTUs were aberrant variants of abundant  
225 ones, we only analysed rare OTUs that had a similarity <97% with any abundant counterpart. We considered as temporally abundant those OTUs with a mean abundance >0.1% along 10 years. Conditional Rare Taxa (opportunistic) were detected following the protocol described in Shade *et al.* (2014).

## 230 RESULTS

### *Quantifying recurrent patterns in different taxa*

The *recurrence index* (RI) that we developed allowed to identify and quantify predictability in different taxonomic groups and OTUs. Overall, microbial eukaryotes present  
235 in the BBMO were very diverse and included more than 63 taxonomic groups at the class level, most of them found both in the pico- and nanoeukaryotic fractions, but with different relative abundances in the two fractions (Fig. S1). Picoeukaryotes were dominated by different alveolates (MALV-I, Dinoflagellata, MALV-II) and Mamiellophyceae (Fig. 1a), with the presence of many other groups at lower relative abundances, whereas  
240 nanoeukaryotes were dominated by Dinoflagellata and Diatomea (Fig. 2a). An inspection of the actual dynamics of the recurrent groups (RI >1.20 for picoeukaryotes, RI >1.15 for nanoeukaryotes) showed ACF values following cycles of 1-year periodicity, pointing to seasonality (see e.g. Mamiellophyceae in Fig. 1b). In picoeukaryotes, 13 of the 58 taxonomic groups tested exhibited a recurrent seasonal behaviour, and these accounted for 39.4% of the  
245 picoeukaryotic reads (Fig. 1a, Table S1). Two of the groups, MALV-III and Mamiellophyceae, exhibited a ‘strong-seasonal’ signal (RI >2.0), whereas the remaining 11 groups, including Dinoflagellata and some environmental clades, were ‘moderately-seasonal’ (1.2 < RI < 2.0). The remaining groups did not display recurrence. For the nanoeukaryotes, 13 groups exhibited seasonal behaviour (representing 8.2% of the nanoeukaryotic reads), and  
250 only MALV-III exhibited a ‘strong-seasonal’ signal (Fig. 2a, Table S2).

We then explored the seasonal behaviour of individual OTUs, as seasonality at the taxonomic group level does not necessarily imply that all composing OTUs are also seasonal and, more interestingly, there can be seasonal OTUs in non-seasonal groups. We focused on the OTUs that were present in at least 10 samples for picoeukaryotes (1,898 OTUs

255 representing ~90% of reads) and in at least 7 samples for nanoeukaryotes (2,266 OTUs  
representing ~91.5% of reads). Only 251 picoeukaryotic OTUs (representing 39.4% of the  
abundance) were seasonal. As expected, seasonal groups generally contained a majority of  
seasonal OTUs (Fig. 1c). Exceptions were low abundance groups (e.g. MALV-V, RAD-B)  
and the Dinoflagellata, which had a RI just above the cut-off (RI=1.23). We also identified  
260 recurrent OTUs in groups that did not show seasonality. In particular, Acantharia,  
Bolidomonas, Cryptomonadales, Dictyochophyceae, MAST-1, and MAST-10 had more reads  
(i.e. abundance) belonging to recurrent OTUs than to non-recurrent. Similar patterns were  
found in nanoeukaryotes (Fig. 2b), where 423 OTUs (accounting for 36.9% of the abundance)  
were seasonal.

265 Seasonal taxa exhibited different strategies based on how long was their persistence in  
the system (that is, ‘long’ and ‘short’ persistents; examples in Fig. S2). Nine out of the 13  
seasonal picoeukaryotic groups (altogether accounting for 99.5% of the seasonal abundance)  
displayed long-persistence, while the remaining 4 groups (0.5% of the abundance) displayed  
short-persistence (Table S1). Persistence was also analysed for the 251 seasonal OTUs. About  
270 31.5% (79 OTUs) showed long-persistence, belonging to groups that also displayed the same  
behaviour; these OTUs featured high relative abundances. The remaining seasonal OTUs had  
short-persistence. Furthermore, among the 89 rare OTUs that appeared in at least 10 samples,  
we detected nine that were ‘moderately-seasonal’ and displayed short-persistence.

## 275 *Community seasonality*

To identify seasonality in community turnover, we calculated mean Bray-Curtis  
dissimilarities between samples separated by different time lags. Communities separated 12  
months and their multiples (24, 36 and so on) showed the highest similarity, while those

separated by 6 months and their multiples showed the highest dissimilarity for both pico- and  
280 nanoeukaryotes (Fig. 3). Thus, the investigated community displayed yearly seasonal patterns.  
Furthermore, community differentiation did not increase with time, as Bray-Curtis distances  
between samples separated by 1 year were very similar to those from samples separated by  
several years. Despite the observed dissimilarity cycling, community differentiation remained  
high during the 10 years, with averaged Bray-Curtis values ranging between 0.7 and 0.9.

285 Further analysis of whole community turnover unveiled two main recurrent structuring  
patterns throughout the 10 years. First, picoeukaryotes and nanoeukaryotes formed different  
groups characterized by their different cell sizes (Fig. S3). Second, samples from both  
assemblages formed two clearly marked groups corresponding to winter and summer months  
(ANOSIM test:  $R_{\text{pico}}=0.717$ ;  $R_{\text{nano}}=0.713$ ,  $p<0.001$ ; Table S3). In contrast, spring and autumn  
290 communities did not form defined groups. In addition, winter communities were more similar  
among themselves when compared to other intra-seasonal variability (Fig. S4). For  
picoeukaryotes, we detected 173 season-specific OTUs, most of them associated to the winter  
and summer states (56 and 59 OTUs respectively, Table S4).

The seasonal patterns at the whole community level shown above were driven by the  
295 most abundant OTUs, which have a stronger weight in Bray-Curtis dissimilarities. Therefore,  
it was relevant to investigate whether the rare biosphere exhibited any seasonality. Within  
picoeukaryotes, 3,095 OTUs were considered permanently rare. Similar to what we found for  
the entire community, we observed two main rare community states associated to winter and  
summer months (Fig. S5a) with spring and autumn communities being transient states. We  
300 also found that the averaged Bray-Curtis values were most similar between rare communities  
separated by 1 year (and their multiples), and most different when separated by half a year  
(Fig. S5b). Bray-Curtis values considering rare taxa were higher than the ones for the entire

community (ranging from 0.9 to almost 1), indicating that despite clear evidence of seasonality, the rare sub-community was very different from year to year.

305

### *Environmental factors and species turnover*

The BBMO site featured annual cyclic fluctuations of environmental conditions: the days were longer in early summer, water temperature was maximal two months later, and inorganic nutrients, particularly nitrate, nitrite and silicate, peaked in winter (Fig. S6).

310 Selected environmental variables were fitted to the NMDS separately for picoeukaryotes and nanoeukaryotes (Fig. 4). In both cases, day length and temperature were the variables better correlated with community turnover (envfit; day length:  $r^2=0.62$ , temperature:  $r^2=0.56$ ,  $p<0.001$ ; Table S5). When controlled by each other in partial mantel tests, both variables still presented a moderate significant correlation with community composition ( $r=0.44$   
315 temperature,  $r=0.40$  day length,  $p=0.001$ ). The remaining environmental variables presented weaker or non-significant correlations with community composition (Table S5). Additional analyses indicated that a large part of community variance (76.8% in PERMANOVA) was not explained by any of the measured environmental variables. Day length and temperature, together, explained only 16% of community variance ( $p<0.001$ ) in PERMANOVA analysis, a  
320 value that increased to 26% when running the analysis only with the OTUs that showed recurrence. Even though environmental variables explained a minor part of community turnover, results from the  $RC_{\text{bray}}$  analyses indicated that 93.4% of the measured  $\beta$ -diversity differed from what it would be observed under random community assembly, thus suggesting environmental selection. Specifically, 86% of the  $\beta$ -diversity comparisons presented  $RC_{\text{bray}} >$   
325  $+0.95$ , and 7.4%  $RC_{\text{bray}} < -0.95$ . Furthermore, by using eLSA analyses we detected 2,375 OTUs that were positively or negatively correlated with the analysed environmental variables

(Table S6); these OTUs tended to be abundant. Specifically, 4% of the OTUs, representing ~47% of the total abundance, were positively or negatively correlated with temperature or day length.

330

### *Diversity patterns*

Most individual samples (~80%) were close to richness saturation (details not shown).

We also found richness saturation when constructing rarefaction curves based on the entire dataset of pico- and nanoeukaryotes (Fig. S7a), indicating that we recovered most of their  
335 diversity present in the BBMO throughout the 10 years. In accumulation curves, richness increased rapidly until approximately the 60<sup>th</sup> month of sampling, and subsequent samples contributed little to new OTUs (Fig. S7b). Alpha diversity presented clear temporal trends. For both size fractions, averaged richness and Shannon indices were highest during the autumn and winter months and significantly lower during spring (Fig. 5,  $p < 0.05$  Wilcoxon  
340 test). No statistical differences were found between pico- and nanoeukaryotes when comparing all samples together, nor when we compared each of the seasons separately (Wilcoxon tests,  $p > 0.05$ ).

## DISCUSSION

345 Predictable patterns in microbial long-term seasonal dynamics have previously been reported (Fuhrman *et al.* 2015; Bunse & Pinhassi 2017). Yet, previous studies have provided limited information on the proportions of the community that display predictable vs. unpredictable dynamics; see e.g. Winder and Cloern (2010). Here, using data from one of the longest protistan time-series analysed to date, we quantified repeatability in species and group  
350 seasonal dynamics along 10 years using a newly developed *Recurrence Index* (RI). We found that the microbial eukaryotic plankton includes species showing predictable as well as unpredictable temporal patterns.

### *Quantifying community seasonality and predictability*

355 Until now, one of the limitations in studies of microbial seasonality was the lack of routines to quantify recurrence patterns in different taxa. Our *recurrence index* (RI) allowed us to quantify the recurrence of all taxonomic groups and OTUs in the analysed temporal series. We found seasonality in only 13.2% and 18.7% of the pico- and nanoeukaryotic OTUs respectively (yet accounting for 39.4% and 36.9% of the abundance). Using the RI, we also  
360 identified seasonality at taxonomic group levels. In particular, Mamiellophyceae and MALV-III featured strong seasonality. As expected, most OTUs within these groups were also seasonal, indicating that this was a conserved trait in most species of the group. The strong seasonality of Mamiellophyceae was already suggested, as species of this group seem to have a preference for low temperatures (Foulon *et al.* 2008), whereas the strong seasonality of  
365 MALV-III is intriguing, given that virtually nothing is known for this group. The opposite scenario, seasonal OTUs within non-seasonal groups, was also found and was explained by contrasting dynamics in different OTUs within a group, MALV-II being a good example. In most cases, seasonal groups and OTUs displayed one peak of abundance per year, despite our



RI can detect other patterns of abundance dynamics (i.e two peaks of abundance per year, one  
370 peak every two years and so on). In a study using Chlorophyll-*a* as a proxy of abundance in  
125 time series studies, Winder and Cloern (2010) found that having one annual abundance  
peak is the most common pattern among phytoplankton (detected in ~48% of the analysed  
time series).

Our results demonstrated that pico- and nanoeukaryotic communities displayed yearly  
375 seasonality throughout the 10 years. Furthermore, as shown by the Raup-Crick analyses, we  
found that  $\beta$ -diversity was significantly different from chance, indicating that community  
dynamics were not driven by ecological drift (Chase *et al.* 2011; Stegen *et al.* 2013).  
Interestingly, there was no temporal trend in community dissimilarity, as the difference  
between communities did not increase with time along the 10 years. This suggests seasonal  
380 recurrence of at least some abundant taxa and absence of mass effects [that is, massive  
immigration] (Lindström & Langenheder 2012). A somewhat contrasting result was found by  
Chow *et al.* (2013) in surface marine prokaryotic communities sampled monthly during 10  
years, as dissimilarity increased slightly during the first fourth years. In our study, averaged  
Bray-Curtis dissimilarity values between any pair of samples was ~0.8, while in Chow *et al.*  
385 (2013) was ~0.6, indicating that seasonal communities are far from identical during their  
turnover, and that there is not a unique community state to return, leaving room for multiple  
community configurations that likely reflect historical processes or ecological drift (Chase  
2003).

Overall, the repeatability in community turnover points to a certain degree of  
390 resilience and predictability in the system (Fuhrman *et al.* 2015), although not all species may  
show these patterns. We found that the majority of OTUs did not present recurrence patterns  
or predictability (or it could not be detected due to the low signal), but the few that did were

particularly abundant. This suggests that the community includes certain amounts of functional redundancy (Allison & Martiny 2008) by which different but ecologically similar OTUs become dominant in different years. Nevertheless, the link between richness and ecosystem function is still unclear. There is evidence indicating that changes in microbial richness affects ecosystem processes (Allison & Martiny 2008; Peter *et al.* 2011), thus pointing towards limited functional redundancy, as well as evidence supporting redundancy (Lyons & Dobbs 2012). Further studies are needed to determine the role of ecological redundancy in microbial plankton dynamics.

Seasonal taxa presented different persistence times, which could point to different strategies according on the time spanned between samplings. Short-persistents might reflect a faster growth under the presence of specific resources and a faster decrease perhaps due to a high predation, competitive pressure or viral mortality. On the other hand, long-persistents could reflect relatively slow growth (and slow use of resources) accompanied with relatively low predation or competition pressures, thus maintaining taxa in the system for relatively longer periods. Long-persistents may also have their growth rate tightly associated to some environmental variables (e.g. temperature), with their abundance reflecting environmental variability. We have also found that 1.6% of the OTUs were Conditionally Rare Taxa (CRT), a magnitude coinciding with that observed by Shade and Gilbert (2015) for prokaryotes. We considered these OTUs opportunistic, with an increase in abundance triggered by environmental cues. Finally, 23.7% of the OTUs were permanently rare, and only 9 of them showed seasonality, similarly to what was observed in marine bacterioplankton (Alonso-Saez *et al.* 2015). The permanently rare sub-community mirrored the recurrent annual pattern found in the whole community, showing that processes driving community turnover act on abundant as well as on rare species. Yet, the overall dissimilarity values among samples from the rare sub-community were higher than the values observed for the whole community,

implying a larger stochasticity in the rare sub-community dynamics. However, detection limits for rare taxa may have inflated  $\beta$ -diversity estimates (Leray & Knowlton 2017).

420 Interestingly, the latter supports the idea that communities include rare species which are metabolically active, as suggested by their seasonality, but never become abundant as they are adapted to a low abundance life (Logares *et al.* 2015) or subjected to high mortality pressures.

#### *Community and OTU response to environmental variation*

425 Similar to bacterioplankton (Fuhrman *et al.* 2015; Bunse & Pinhassi 2017), we hypothesized that environmental selection would be a major force driving protist community seasonality. However, the measured environmental factors explained a minor fraction of community variability along the 10 years, which agrees with a previous study of protists showing that environmental fluctuations were explaining ~30% of community seasonality  
430 (Genitsaris *et al.* 2015). A possible explanation is that environmental selection has different effects on microbial eukaryotic and prokaryotic plankton (Logares *et al.* 2017), thus affecting their dynamics. Nevertheless, the studied system oscillated between two main community configurations that corresponded to winter and summer months, pointing to some degree of environmental selection. Interestingly, we found that a small fraction of pico-eukaryotic  
435 OTUs (~4%), yet representing ~47% of the total abundance, correlated positively or negatively with temperature and day length; temperature is an important factor structuring marine bacterioplankton communities across space (Sunagawa *et al.* 2015) and time (Fuhrman *et al.* 2006; Chow *et al.* 2013). Thus, we found evidence of environmental selection associated to variables that contrast between summer and winter, but such selection seems to  
440 be experienced by only a subset of the taxa in the community. Overall, differential or limited responses of OTUs to environmental variation may explain the low correlation between whole community and environmental variation, as contrasting OTU dynamics may cancel out

or generate noise in whole-community analyses. Furthermore, the presence of two community states suggests that environmental selection intensity may change throughout the year, being  
445 stronger in summer and winter, and weaker in spring and autumn, thus allowing for ecological drift (Chase 2003) in the latter seasons. This is consistent with the larger number of OTUs exclusively associated to summer and winter months as compared to those associated to autumn and spring. In addition, the fact that winter communities were the most similar along the 10 years indicate a stronger environmental selection during this period compared to  
450 summer. Besides, autumn and spring may be intrinsically more variable seasons, with episodic rains and less constant temperatures/irradiances, representing year-specific environmental selection regimes. In particular, spring and autumn communities appeared as transitional states. The existence of two main states and two transitional states has previously been reported for Atlantic Ocean bacterioplankton (Ward *et al.* 2017), while the analysis of  
455 protist dynamics during two and a half years in the English Channel revealed three seasonal states corresponding to summer, autumn-winter, and spring (Genitsaris *et al.* 2015). Overall, the existence of recurrent states associated to different seasons suggests that environmental selection drives, to certain extent, community dynamics. Finally, ecological interactions can also have a role in community turnover, yet it has been suggested that they affect dynamics in  
460 periods ranging from days to weeks (Bunse & Pinhassi 2017).

In summary, by applying our *recurrence index* to data from one of the longest microbial time series to date, we show that microbial plankton communities include both taxa with predictable as well as unpredictable dynamics. Our quantifications indicate that 13.2%  
465 and 18.6% of the pico- and nanoeukaryotic OTUs representing 39.4% and 36.9% of the abundance respectively were seasonal or predictable. Thus, most taxa in our system had unpredictable temporal dynamics or we could not detect it. To our knowledge, this is the first

time that both behaviours are reported to coexist in microbial plankton communities and  
quantified at the OTU level. Future studies need to determine whether the latter amount of  
470 seasonal predictability is typical of microbial communities in other temperate zones.

## ACKNOWLEDGEMENTS

We thank all members of the Blanes Bay Microbial Observatory sampling team and the multiple projects funding this collaborative effort over the years. The data and analyses  
475 done here have been funded by the Spanish projects FLAME (CGL2010-16304, MICINN) and ALLFLAGS (CTM2016-75083-R, MINECO) to RM and INTERACTOMICS (CTM2015-69936-P, MINECO/FEDER, EU) to RL and the European project DEVOTES (grant agreement no. 308392) to EG. CRG was supported by a FPI fellowship. RL was supported by a Ramón y Cajal fellowship (RYC-2013-12554, MINECO, Spain). We thank  
480 Guillem Salazar for his help with R analyses. Bioinformatic analyses have been performed at the Marbits platform (ICM-CSIC; <https://marbits.icm.csic.es>).

485 **REFERENCES**

- Allison, S.D. & Martiny, J.B. (2008). Resistance, resilience, and redundancy in microbial communities. *Proc Natl Acad Sci U S A*, 105 Suppl 1, 11512-11519.
- Alonso-Saez, L., Diaz-Perez, L. & Moran, X.A. (2015). The hidden seasonality of the rare  
490 biosphere in coastal marine bacterioplankton. *Environmental microbiology*, 17, 3766-3780.
- Bunse, C. & Pinhassi, J. (2017). Marine Bacterioplankton Seasonal Succession Dynamics. *Trends in microbiology*, 25, 494-505.
- Campbell, B.J., Yu, L., Heidelberg, J.F. & Kirchman, D.L. (2011). Activity of abundant and  
495 rare bacteria in a coastal ocean. *Proceedings of the National Academy of Sciences of the United States of America*, 108, 12776-12781.
- Caron, D.A., Worden, A.Z., Countway, P.D., Demir, E. & Heidelberg, K.B. (2009). Protists are microbes too: a perspective. *ISME J*, 3, 4-12.
- Chase, J.M. (2003). Community assembly: when should history matter? *Oecologia*, 136, 489-  
500 498.
- Chase, J.M., Kraft, N.J.B., Smith, K.G., Vellend, M. & Inouye, B.D. (2011). Using null models to disentangle variation in community dissimilarity from variation in  $\alpha$  - diversity. *Ecosphere*, 2, 1-11.
- Chow, C.E., Sachdeva, R., Cram, J.A., Steele, J.A., Needham, D.M., Patel, A. *et al.* (2013).  
505 Temporal variability and coherence of euphotic zone bacterial communities over a decade in the Southern California Bight. *The ISME journal*, 7, 2259-2273.
- Clarke, K.R. (1993). Nonparametric multivariate analyses of changes in community structure. *Australian Journal of Ecology*, 18, 117-143.

- Countway, P.D., Vigil, P.D., Schnetzer, A., Moorthi, S.D. & Caron, D.A. (2010). Seasonal  
510 analysis of protistan community structure and diversity at the USC Microbial  
Observatory (San Pedro Channel, North Pacific Ocean). *Limnology and  
Oceanography*, 55, 2381-2396.
- Dufrene, M. & Legendre, P. (1997). Species assemblages and indicator species: the need for a  
flexible asymmetrical approach. *Ecological Monographs*, 67, 345-366.
- 515 Edgar, R.C. (2013). UPARSE: highly accurate OTU sequences from microbial amplicon  
reads. *Nature methods*, 10, 996-998.
- Falkowski, P. (2012). The power of plankton. *Nature*, 483, S17-20.
- Foulon, E., Not, F., Jalabert, F., Cariou, T., Massana, R. & Simon, N. (2008). Ecological  
niche partitioning in the picoplanktonic green alga *Micromonas pusilla*: evidence from  
520 environmental surveys using phylogenetic probes. *Environmental microbiology*, 10,  
2433-2443.
- Fuhrman, J.A., Cram, J.A. & Needham, D.M. (2015). Marine microbial community dynamics  
and their ecological interpretation. *Nature reviews. Microbiology*, 13, 133-146.
- Fuhrman, J.A., Hewson, I., Schwalbach, M.S., Steele, J.A., Brown, M.V. & Naeem, S. (2006).  
525 Annually reoccurring bacterial communities are predictable from ocean conditions.  
*Proceedings of the National Academy of Sciences of the United States of America*, 103,  
13104-13109.
- Gasol, J.M., Cardelús, C., G. Morán, X.A., Balagué, V., Forn, I., Marrasé, C. *et al.* (2016).  
Seasonal patterns in phytoplankton photosynthetic parameters and primary production  
530 at a coastal NW Mediterranean site. *Scientia Marina*, 80, 63-77.
- Genitsaris, S., Monchy, S., Viscogliosi, E., Sime-Ngando, T., Ferreira, S. & Christaki, U.  
(2015). Seasonal variations of marine protist community structure based on taxon-



specific traits using the eastern English Channel as a model coastal system. *FEMS microbiology ecology*, 91.

- 535 Giner, C.R., Massana, R. & Logares, R. (2017). Index for assessing recurrence patterns in microbial temporal data. <https://doi.org/10.5281/zenodo.826406>.
- Grasshoff, K., Ehrhardt, M. & Kremling, K. (1983). *Methods on seawater analysis*. Weinheim: Verlag Chemie.
- Guillou, L., Bachar, D., Audic, S., Bass, D., Berney, C., Bittner, L. *et al.* (2013). The Protist Ribosomal Reference database (PR2): a catalog of unicellular eukaryote small sub-
- 540 unit rRNA sequences with curated taxonomy. *Nucleic acids research*, 41, D597-604.
- Hanson, C.A., Fuhrman, J.A., Horner-Devine, M.C. & Martiny, J.B. (2012). Beyond biogeographic patterns: processes shaping the microbial landscape. *Nature reviews. Microbiology*, 10, 497-506.
- 545 Keeling, P.J. & Del Campo, J. (2017). Marine Protists Are Not Just Big Bacteria. *Curr Biol*, 27, R541-R549.
- Kim, D.Y., Countway, P.D., Jones, A.C., Schnetzer, A., Yamashita, W., Tung, C. *et al.* (2014). Monthly to interannual variability of microbial eukaryote assemblages at four depths in the eastern North Pacific. *The ISME journal*, 8, 515-530.
- 550 Langenheder, S. & Szekely, A.J. (2011). Species sorting and neutral processes are both important during the initial assembly of bacterial communities. *ISME J*, 5, 1086-1094.
- Legendre, P. & Legendre, L. (1998). *Numerical Ecology*. 2n edn. Elsevier Science BV, Amsterdam.
- Leray, M. & Knowlton, N. (2017). Random sampling causes the low reproducibility of rare
- 555 eukaryotic OTUs in Illumina COI metabarcoding. *PeerJ*, 5, e3006.

- Lindh, M.V., Sjostedt, J., Andersson, A.F., Baltar, F., Hugerth, L.W., Lundin, D. *et al.* (2015).  
Disentangling seasonal bacterioplankton population dynamics by high-frequency  
sampling. *Environmental microbiology*, 17, 2459-2476.
- Lindström, E.S. & Langenheder, S. (2012). Local and regional factors influencing bacterial  
560 community assembly. *Environ Microbiol Rep*, 4, 1-9.
- Logares, R. (2017). Workflow for Analysing MiSeq Amplicons based on Uparse v1.5.  
<https://doi.org/10.5281/zenodo.259579>.
- Logares, R., Audic, S., Bass, D., Bittner, L., Boutte, C., Christen, R. *et al.* (2014). Patterns of  
rare and abundant marine microbial eukaryotes. *Curr Biol*, 24, 813-821.
- 565 Logares, R., Lindstrom, E.S., Langenheder, S., Logue, J.B., Paterson, H., Laybourn-Parry, J.  
*et al.* (2013). Biogeography of bacterial communities exposed to progressive long-  
term environmental change. *The ISME journal*, 7, 937-948.
- Logares, R., Mangot, J.F. & Massana, R. (2015). Rarity in aquatic microbes: placing protists  
on the map. *Research in microbiology*, 166, 831-841.
- 570 Logares, R., Tesson, S.V.M., Canbäck, B., Pontarp, M., Hedlund, K. & Rengefors, K. (2017).  
Habitat diversification promotes environmental selection in planktonic prokaryotes  
and ecological drift in microbial eukaryotes. *bioRxiv*, <https://doi.org/10.1101/161091>.
- Lyons, M.M. & Dobbs, F.C. (2012). Differential utilization of carbon substrates by aggregate-  
associated and water-associated heterotrophic bacterial communities. *Hydrobiologia*,  
575 686, 181-193.
- Massana, R., Balague, V., Guillou, L. & Pedros-Alio, C. (2004). Picoeukaryotic diversity in  
an oligotrophic coastal site studied by molecular and culturing approaches. *FEMS  
microbiology ecology*, 50, 231-243.

- Massana, R., Gobet, A., Audic, S., Bass, D., Bittner, L., Boutte, C. *et al.* (2015). Marine  
580 protist diversity in European coastal waters and sediments as revealed by high-  
throughput sequencing. *Environmental microbiology*, 17, 4035-4049.
- Massana, R. & Logares, R. (2013). Eukaryotic versus prokaryotic marine picoplankton  
ecology. *Environ Microbiol*, 15, 1254-1261.
- Ofiteru, I.D., Lunn, M., Curtis, T.P., Wells, G.F., Criddle, C.S., Francis, C.A. *et al.* (2010).  
585 Combined niche and neutral effects in a microbial wastewater treatment community.  
*Proc Natl Acad Sci U S A*, 107, 15345-15350.
- Oksanen, J., Kindt, R., Legendre, P., O'Hara, B., Simpson, G.L., Solymos, P. *et al.* (2008).  
vegan: Community Ecology Package. R package version 1.15-0.
- Pedrós-Alió, C. (2006). Marine microbial diversity: can it be determined? *Trends Microbiol*,  
590 14, 257-263.
- Pedrós-Alió, C. (2012). The rare bacterial biosphere. *Ann Rev Mar Sci*, 4, 449-466.
- Pernice, M.C., Logares, R., Guillou, L. & Massana, R. (2013). General patterns of diversity in  
major marine microeukaryote lineages. *PloS one*, 8, e57170.
- Peter, H., Beier, S., Bertilsson, S., Lindstrom, E.S., Langenheder, S. & Tranvik, L.J. (2011).  
595 Function-specific response to depletion of microbial diversity. *ISME J*, 5, 351-361.
- Piredda, R., Tomasino, M.P., D'Erchia, A.M., Manzari, C., Pesole, G., Montresor, M. *et al.*  
(2017). Diversity and temporal patterns of planktonic protist assemblages at a  
Mediterranean Long Term Ecological Research site. *FEMS microbiology ecology*, 93.
- R-Development-Core-Team (2008). *R: A language and environment for statistical computing*.  
600 R Foundation for Statistical Computing, Vienna, Austria.
- Roberts, D.W. (2016). labdsv: Ordination and Multivariate Analysis for Ecology. R package  
version 1.8-0.

- Romari, K. & Vaultot, D. (2004). Composition and temporal variability of picoeukaryote communities at a coastal site of the English Channel from 18S rDNA sequences.
- 605 *Limnology and Oceanography*.
- Ruan, Q., Dutta, D., Schwalbach, M.S., Steele, J.A., Fuhrman, J.A. & Sun, F. (2006). Local similarity analysis reveals unique associations among marine bacterioplankton species and environmental factors. *Bioinformatics*, 22, 2532-2538.
- Salazar, G. (2015). EcolUtils: Utilities for community ecology analysis. R package version
- 610 0.1. <https://github.com/GuillemSalazar/EcolUtils>.
- Schauer, M., Balague, V., Pedros-Alio, C. & Massana, R. (2003). Seasonal changes in the taxonomic composition of bacterioplankton in a coastal oligotrophic system. *Aquatic Microbial Ecology*, 21.
- Shade, A. & Gilbert, J.A. (2015). Temporal patterns of rarity provide a more complete view
- 615 of microbial diversity. *Trends in microbiology*, 23, 335-340.
- Shade, A., Jones, S.E., Caporaso, J.G., Handelsman, J., Knight, R., Fierer, N. *et al.* (2014). Conditionally rare taxa disproportionately contribute to temporal changes in microbial diversity. *mBio*, 5, e01371-01314.
- Stegen, J.C., Lin, X., Fredrickson, J.K., Chen, X., Kennedy, D.W., Murray, C.J. *et al.* (2013).
- 620 Quantifying community assembly processes and identifying features that impose them. *ISME J*, 7, 2069-2079.
- Stoeck, T., Bass, D., Nebel, M., Christen, R., Jones, M.D., Breiner, H.W. *et al.* (2010). Multiple marker parallel tag environmental DNA sequencing reveals a highly complex eukaryotic community in marine anoxic water. *Molecular ecology*, 19 Suppl 1, 21-31.
- 625 Sunagawa, S., Coelho, L.P., Chaffron, S., Kultima, J.R., Labadie, K., Salazar, G. *et al.* (2015). Structure and function of the global ocean microbiome. *Science*, 348, 1261359.

- Suzuki, R. & Shimodaira, H. (2006). Pvcust: an R package for assessing the uncertainty in hierarchical clustering. *Bioinformatics*, 22, 1540-1542.
- Vellend, M. (2010). Conceptual synthesis in community ecology. *Q Rev Biol*, 85, 183-206.
- 630 Ward, C.S., Yung, C.M., Davis, K.M., Blinbry, S.K., Williams, T.C., Johnson, Z.I. *et al.* (2017). Annual community patterns are driven by seasonal switching between closely related marine bacteria. *The ISME journal*, 11, 1412-1422.
- Winder, M. & Cloern, J.E. (2010). The annual cycles of phytoplankton biomass. *Philos Trans R Soc Lond B Biol Sci*, 365, 3215-3226.
- 635 Xia, L.C., Steele, J.A., Cram, J.A., Cardon, Z.G., Simmons, S.L., Vallino, J.J. *et al.* (2011). Extended local similarity analysis (eLSA) of microbial community and other time series data with replicates. *BMC systems biology*, 5 Suppl 2, S15.
- Yentsch, C.S. & Menzel, D.W. (1963). A method for the determination of phytoplankton chlorophyll and phaeophytin by fluorescence. *Deep Sea Research* 10, 221-231.

640

## Figure legends

**Figure 1.** Taxonomic groups constituting the picoeukaryotic community in the BBMO and indications of their seasonality. (a) Average relative abundances of groups accounting for >0.2% of the reads. The bars are colored according to whether the group as a whole exhibits seasonality. (b) Selected autocorrelation function (ACF) plots showing ‘strong seasonality’ (Mamiellophyceae), ‘moderate seasonality’ (Dinoflagellata) and ‘no seasonality’ (MALV-I), together with their RI value. (c) Seasonal and non-seasonal signals for the main groups. The figure shows the number of OTUs (dots) and their percentage to all reads (bars) for each taxonomic group. Only OTUs present in >10 samples were considered.

**Figure 2.** Taxonomic groups constituting the nanoeukaryotic community in the BBMO and indications of their seasonality. (a) Average relative abundances of groups accounting for >0.2% of the reads. The bars are colored according to whether the group as a whole exhibits seasonality. (b) Seasonal and non-seasonal signal for the main groups. The figure shows the number of OTUs (dots) and their percentage to all reads (bars) for each taxonomic group. Only OTUs present in >7 samples were considered. [\* represents groups that have more than 100 OTUs].

**Figure 3.** Inter-annual recurrence of communities of picoeukaryotes (a) and nanoeukaryotes (b), shown by the average Bray-Curtis dissimilarities of all pairs of communities separated by a given number of months (from 1 to 119 in a) and from 1 to 74 in b)).

**Figure 4.** NMDS analysis of protist communities in monthly samples taken during 10 years in the BBMO showing the environmental vectors that better fit the plot after an Envfit test for the picoeukaryotes (a), and the nanoeukaryotes (b).

**Figure 5.** Monthly variation of alpha diversity present in BBMO protist communities.

Boxplots display the monthly variability during 10 years of the richness (a, b) and Shannon  
665 indices (c, d) for the picoeukaryotes (a, c) and nanoeukaryotes (b, d).

Fig. 1

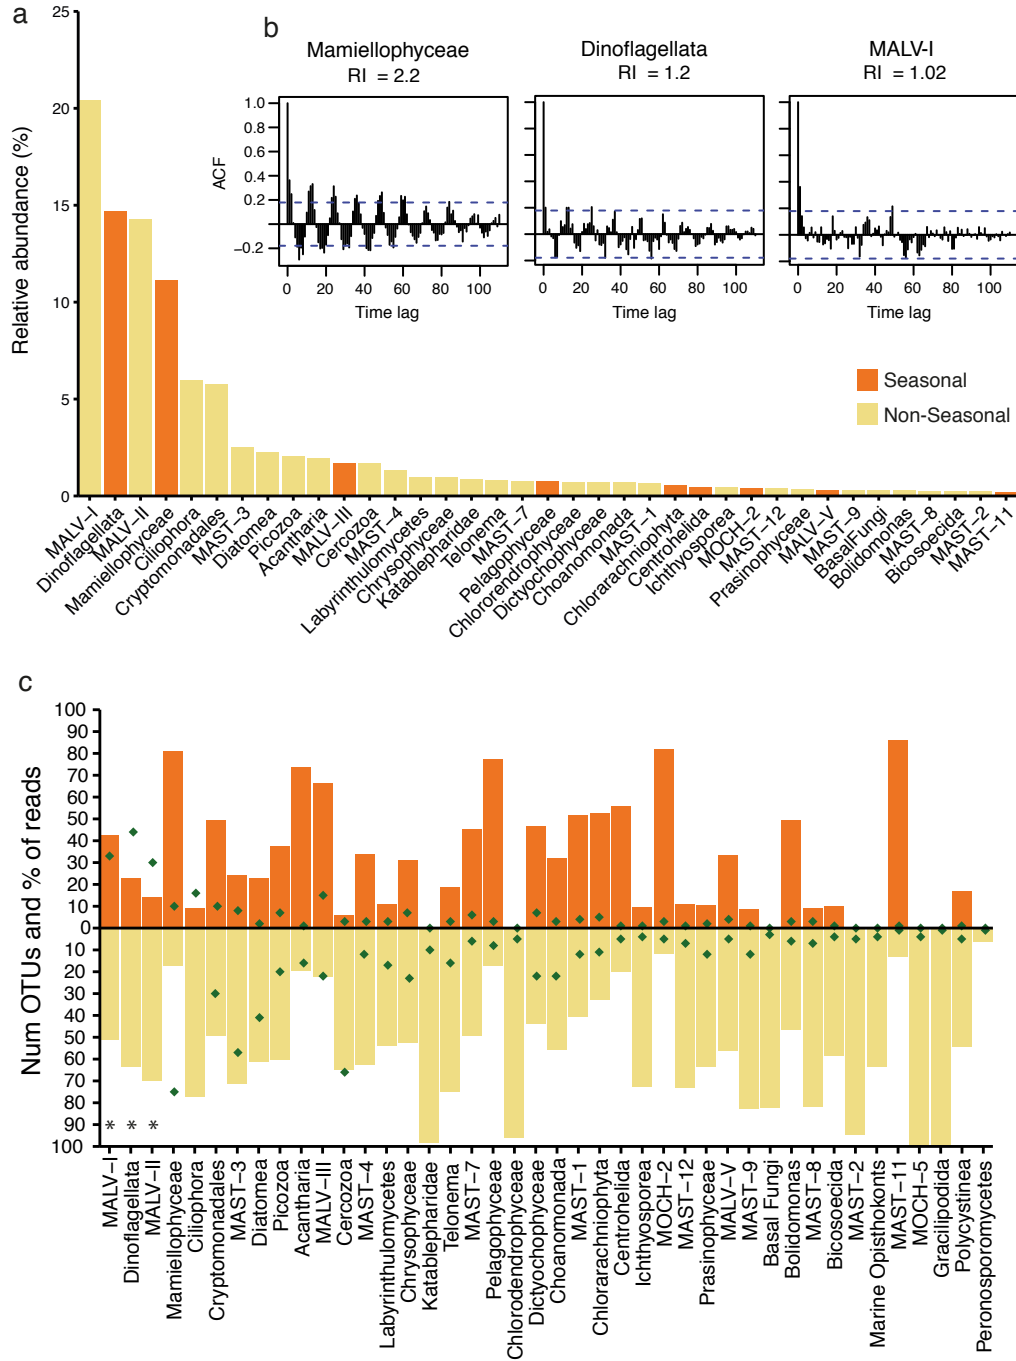



Fig. 2

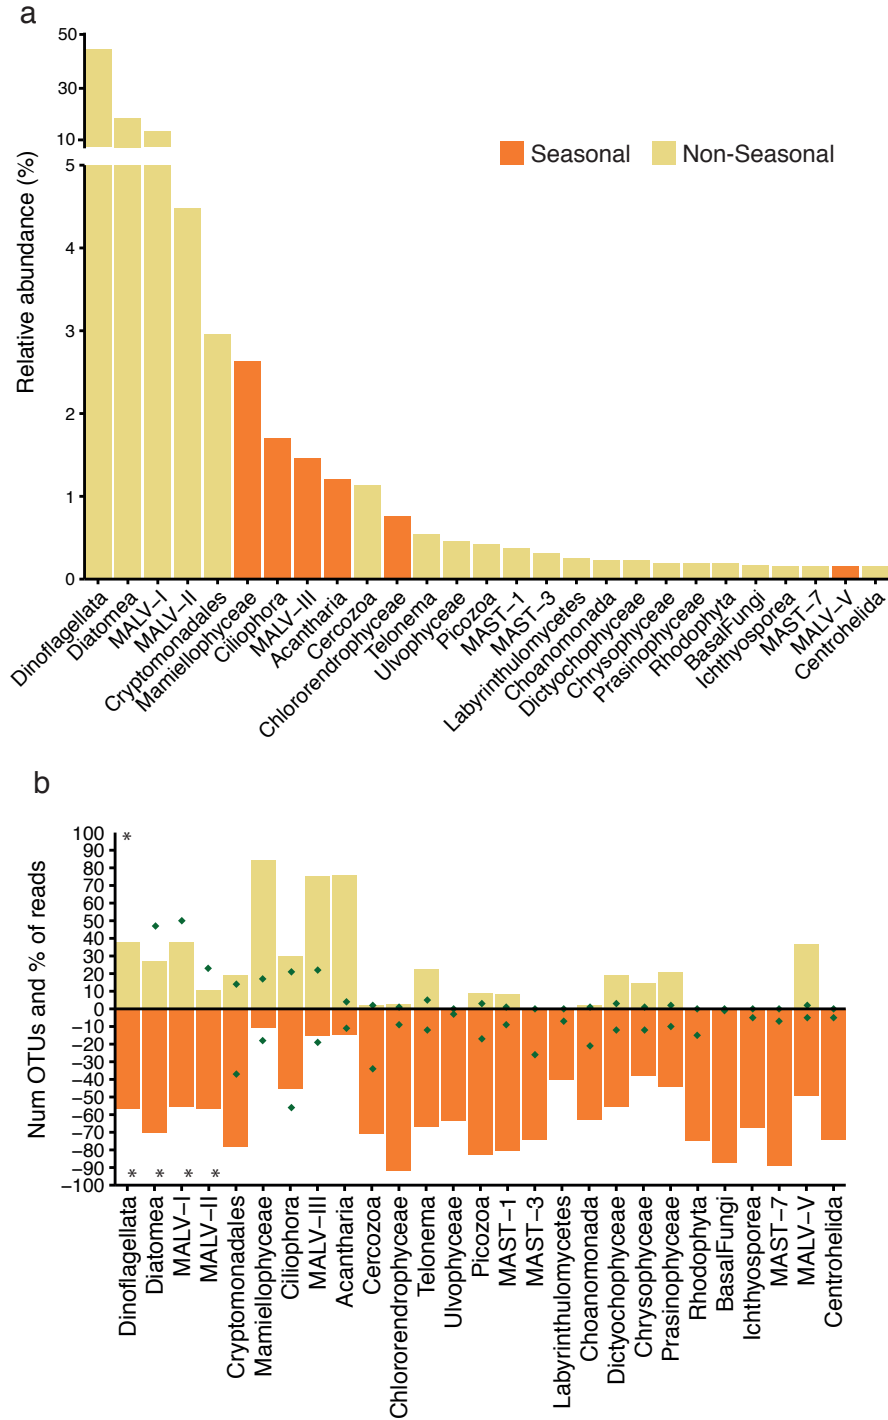

Fig. 3

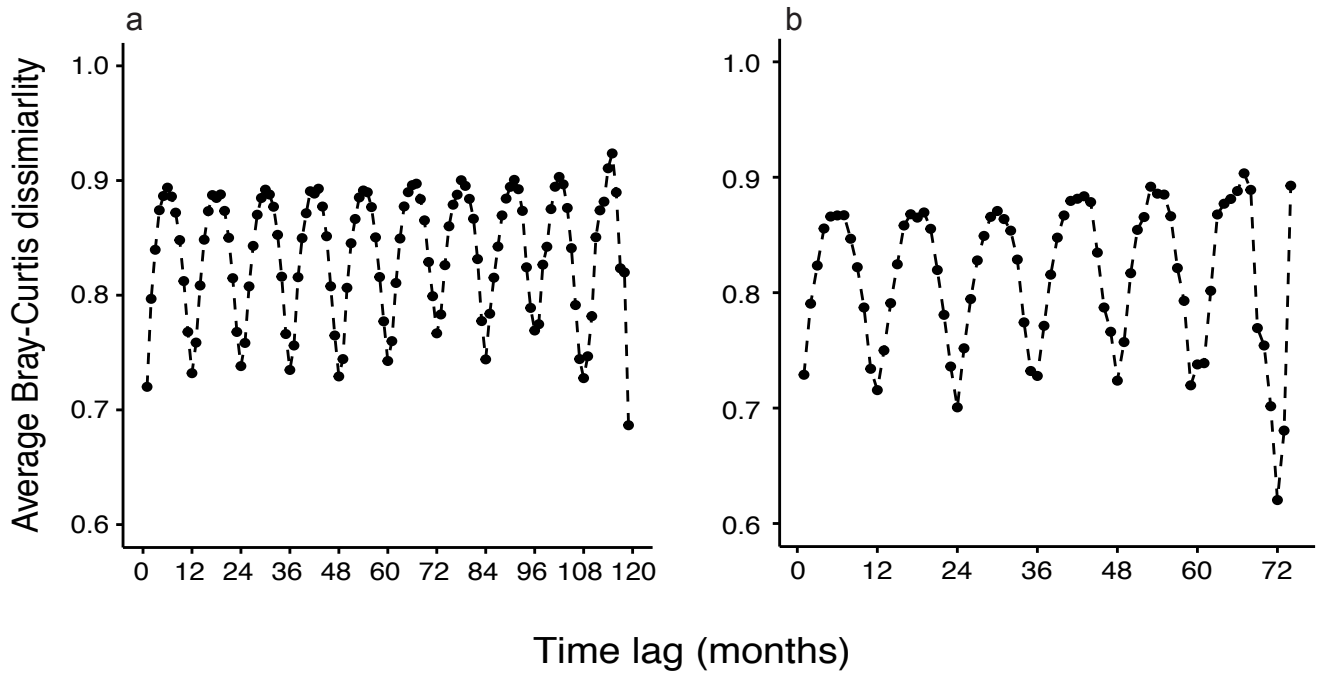

Fig. 4

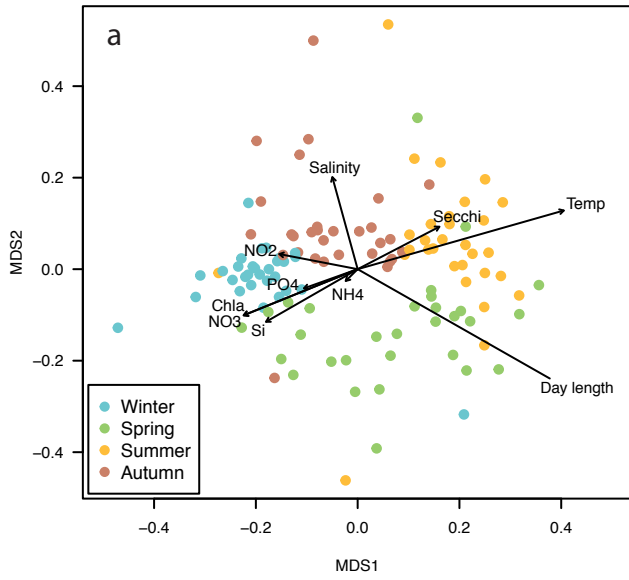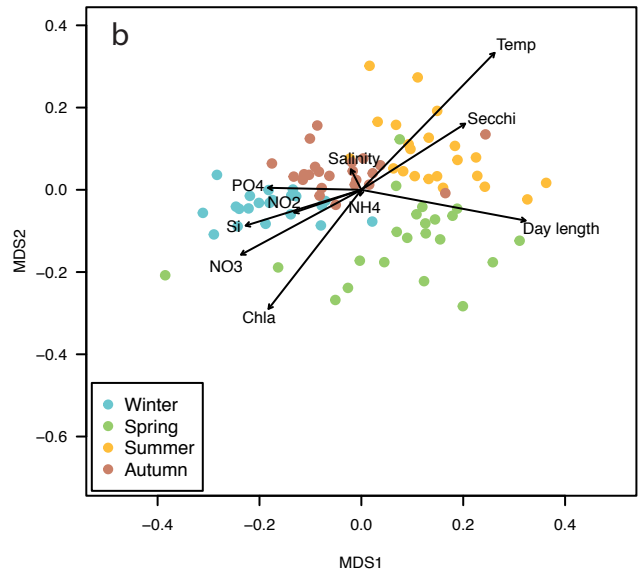

Fig. 5

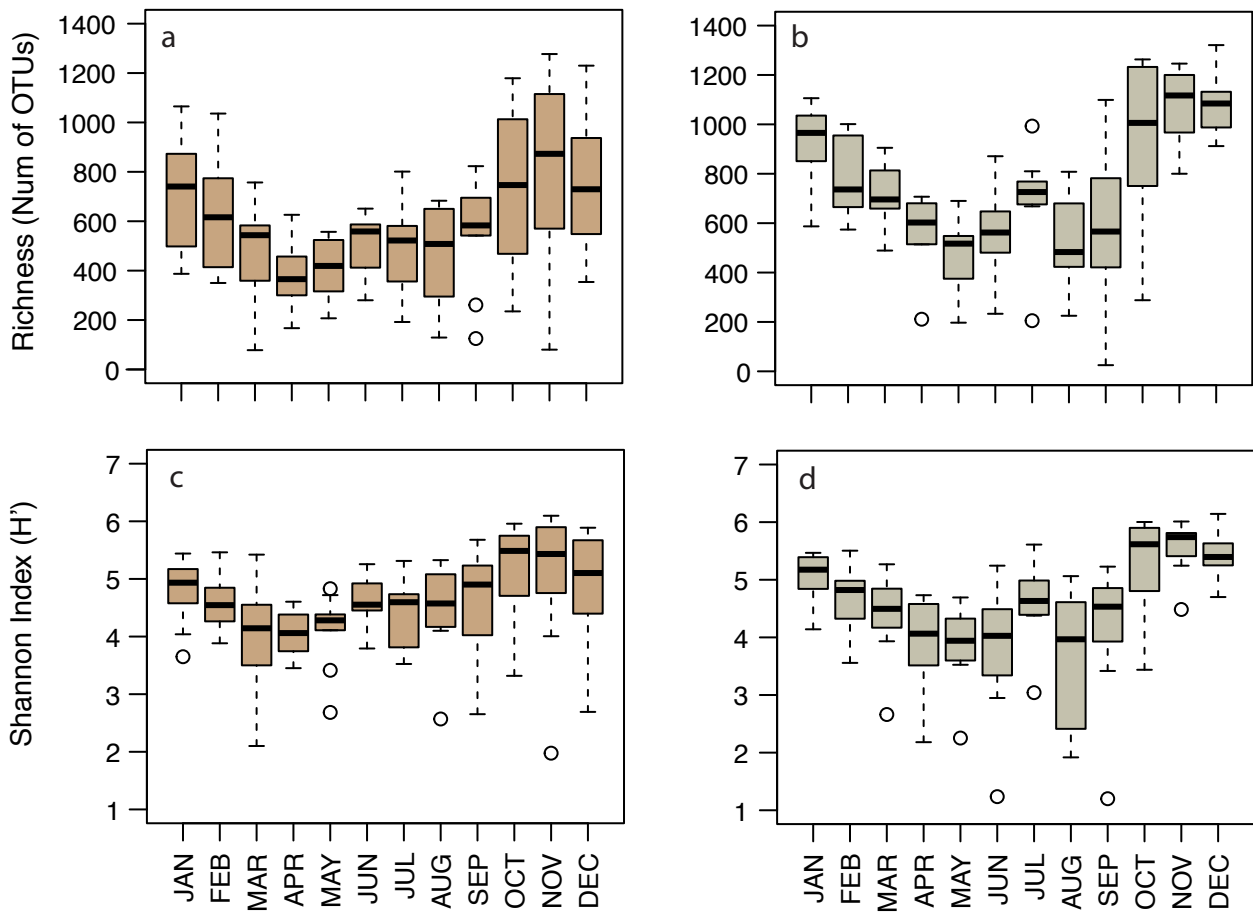

Source: http://biorxiv.org/content/10.1101/237743v1.full.pdf
